# Supplementary material
Source: MDPI journal article supplement (https://www.mdpi.com/2076-3417/11/12/5516)

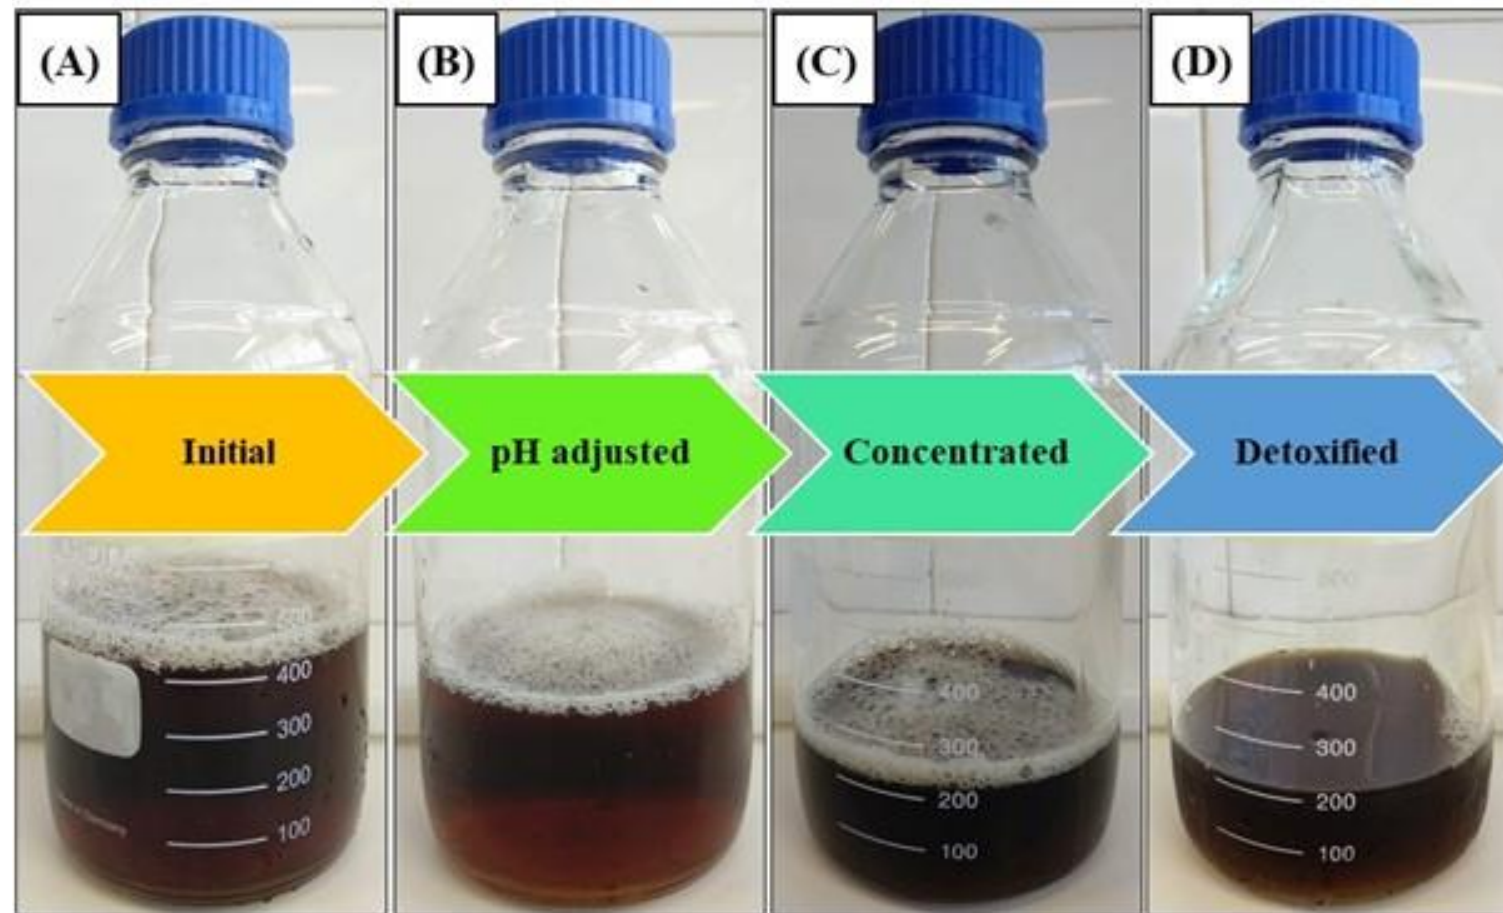

Fig. SI.1

Supplement: s1 [file s1]
